# Supplementary material for: Violent injury prevention does not equal to violent crime prevention: an analysis of violence intervention program efficacy using propensity score methods
Source: HighWire-hosted journal article supplement (doi:10.1136/tsaco-2022-000905), 2022-10-01
Supplement: tsaco-2022-000905supp001_data_supplement.pdf [file tsaco-2022-000905supp001_data_supplement.pdf]

## Violent Injury Prevention Does Not Equal Violent Crime Prevention: An Analysis of Violence

### Intervention Program Efficacy Using Propensity Score Methods

#### Authors:

Emma Holler MPH<sup>1</sup> (Co-first author), [emorone@iu.edu](mailto:emorone@iu.edu)  
Damaris Ortiz MD<sup>2,3,6</sup> (Co-first author), [damaorti@iu.edu](mailto:damaorti@iu.edu)  
Sanjay Mohanty MD, MS<sup>2,6</sup>, [mohantys@iu.edu](mailto:mohantys@iu.edu)  
Ashley Meagher MD MPH<sup>2,4,6</sup>, [ameagher1@iuhealth.org](mailto:ameagher1@iuhealth.org)  
Malaz Boustani MD MPH<sup>5,6</sup>, [mboustan@iu.edu](mailto:mboustan@iu.edu)  
Ben Zarzaur MD MPH<sup>7</sup>, [zarzaur@surgery.wisc.edu](mailto:zarzaur@surgery.wisc.edu)  
Clark Simons MD<sup>2,3</sup>, [cjsimons@iupui.edu](mailto:cjsimons@iupui.edu)

1. Department of Epidemiology and Biostatistics, Indiana University, Bloomington, IN, USA
2. Department of Surgery, Indiana University School of Medicine, Indianapolis, IN, USA
3. Sidney & Lois Eskenazi Hospital Smith Level 1 Trauma Center, 720 Eskenazi Ave, Indianapolis, IN 46202
4. Indiana University Health Methodist Hospital, 1701 N Senate Blvd, Indianapolis, IN 46202
5. Department of Medicine, Indiana University School of Medicine, Indianapolis, IN, USA
6. Center of Health Innovation and Implementation Science, Center for Translational Science and Innovation, Indiana University, 410 W. 10<sup>th</sup> St, Indianapolis
7. Department of Surgery, University of Wisconsin School of Medicine, Madison, WI, USA

#### Corresponding author:

Damaris Ortiz, MD

Email: [damaorti@iu.edu](mailto:damaorti@iu.edu) Fax: 317-880-0414 Phone: 317-880-5048

## SUPPLEMENT

**eTable 1.** Standardized Mean Differences and Variance Ratios (RxH - Control) for Baseline Covariates After IPTW, Main Analysis

| Variable                         | Observation Type | Standardized Mean Difference | Percent Reduction | Variance Ratio |
|----------------------------------|------------------|------------------------------|-------------------|----------------|
| Age                              | Weighted         | -0.1442                      | 81.22             | 0.7925         |
| National ADI Percentile          | Weighted         | 0.01193                      | 94.28             | 0.7359         |
| Hospital LOS                     | Weighted         | 0.049                        | 88.87             | 0.5997         |
| Race - Black                     | Weighted         | -0.1009                      | 75.56             | 1.0574         |
| Race - White                     | Weighted         | 0.11476                      | 76.14             | 1.0724         |
| Insurance - Government           | Weighted         | -0.1525                      | 82.32             | 0.958          |
| Insurance - Commercial           | Weighted         | 0.03845                      | 90.25             | 1.0635         |
| Insurance – Self Pay             | Weighted         | 0.03222                      | 93.67             | 1.0238         |
| MOI - GSW                        | Weighted         | 0.14659                      | 82.37             | 0.9582         |
| MOI - Assault                    | Weighted         | -0.1765                      | 79.76             | 0.8511         |
| MOI - Stab                       | Weighted         | 0.00367                      | 96.84             | 1.0068         |
| AIS Thorax                       | Weighted         | 0.13457                      | 48.09             | 1.0184         |
| AIS Abdomen                      | Weighted         | -0.1021                      | 46.9              | 0.8094         |
| EMS Provider                     | Weighted         | -0.0776                      | 84.19             | 1.0242         |
| Sex                              | Weighted         | -0.0128                      | 94.19             | 0.9781         |
| Hypotension                      | Weighted         | 0.03622                      | 89.44             | 0.8348         |
| Positive Alcohol Screen          | Weighted         | -0.2267                      | 0                 | 1.2123         |
| Positive Drug Screen             | Weighted         | 0.48502                      | 0                 | 0.8735         |
| Received Blood in First 24 hours | Weighted         | -0.0643                      | 70.68             | 1.1474         |
| Admitted to ICU                  | Weighted         | -0.2625                      | 26.27             | 1.2493         |
| Ventilator Use                   | Weighted         | -0.1375                      | 0                 | 1.2632         |
| History of Violent Crime         | Weighted         | 0.11727                      | 31.89             | 0.7404         |
| History of Violent Injury        | Weighted         | 0.01811                      | 80.92             | 0.7739         |

Abbreviations: IPTW, inverse probability of treatment weighting; PS, propensity score; ADI, area deprivation index; LOS, length of stay; GSW, gunshot wound; MOI, mechanism of injury; EtOH, alcohol; ICU, intensive care unit.

**eTable 2.** Standardized Mean Differences and Variance Ratios (Completed RxH -

## Control) for Baseline Covariates After IPTW, Sensitivity Analysis

| Variable                                                                                                                                                                                                                        | Observation Type | Standardized Mean Difference | Percent Reduction | Variance Ratio |
|---------------------------------------------------------------------------------------------------------------------------------------------------------------------------------------------------------------------------------|------------------|------------------------------|-------------------|----------------|
| Age                                                                                                                                                                                                                             | Weighted         | -0.3628                      | 40.31             | 0.7862         |
| National ADI Percentile                                                                                                                                                                                                         | Weighted         | -0.1955                      | 33.24             | 1.0553         |
| Hospital LOS                                                                                                                                                                                                                    | Weighted         | 0.35939                      | 20.69             | 0.7117         |
| Race - Black                                                                                                                                                                                                                    | Weighted         | -0.3691                      | 33.7              | 0.6917         |
| Race - White                                                                                                                                                                                                                    | Weighted         | -0.0745                      | 80.39             | 0.8109         |
| Insurance - Government                                                                                                                                                                                                          | Weighted         | 0.04374                      | 85.76             | 1.1878         |
| Insurance - Commercial                                                                                                                                                                                                          | Weighted         | 0.4023                       | 36.26             | 1.2376         |
| Insurance – Self Pay                                                                                                                                                                                                            | Weighted         | -0.3356                      | 56.39             | 0.9373         |
| MOI - GSW                                                                                                                                                                                                                       | Weighted         | -0.0107                      | 94.4              | 0.9791         |
| MOI - Assault                                                                                                                                                                                                                   | Weighted         | 0.93381                      | 18.93             | 0.4814         |
| MOI - Stab                                                                                                                                                                                                                      | Weighted         | -1.0289                      | 6.62              | 0              |
| AIS Thorax                                                                                                                                                                                                                      | Weighted         | -0.0707                      | 72.99             | 0.8819         |
| AIS Abdomen                                                                                                                                                                                                                     | Weighted         | 0.29143                      | 54.13             | 0.5312         |
| EMS Provider                                                                                                                                                                                                                    | Weighted         | 0.01556                      | 95.96             | 0.9976         |
| Sex                                                                                                                                                                                                                             | Weighted         | -0.0452                      | 0                 | 0.9265         |
| Hypotension                                                                                                                                                                                                                     | Weighted         | 0.00373                      | 99.09             | 0.9735         |
| Positive Alcohol Screen                                                                                                                                                                                                         | Weighted         | -0.0989                      | 0                 | 1.0972         |
| Positive Drug Screen                                                                                                                                                                                                            | Weighted         | 0.81092                      | 0                 | 0.56           |
| Received Blood in First 24 hours                                                                                                                                                                                                | Weighted         | -0.2839                      | 42.63             | 1.3086         |
| Admitted to ICU                                                                                                                                                                                                                 | Weighted         | -0.3399                      | 0                 | 1.5569         |
| Ventilator Use                                                                                                                                                                                                                  | Weighted         | -0.0272                      | 88.38             | 1.0654         |
| History of Violent Crime                                                                                                                                                                                                        | Weighted         | 0.0503                       | 0                 | 0.4787         |
| History of Violent Injury                                                                                                                                                                                                       | Weighted         | 1.12228                      | 26.33             | 0.0267         |
| Abbreviations: IPTW, inverse probability of treatment weighting; PS, propensity score; ADI, area deprivation index; LOS, length of stay; GSW, gunshot wound; MOI, mechanism of injury; EtOH, alcohol; ICU, intensive care unit. |                  |                              |                   |                |
